# Supplementary figures and images for: Oral administration of the selective GPR120/FFA4 agonist compound A is not effective in alleviating tissue inflammation in mouse models of prototypical autoimmune diseases
Source: PubMed Central journal article supplement — Pharmacol Res Perspect. 2018 Nov 8;6(6):e00438. doi: 10.1002/prp2.438 (PMC6223243; doi:10.1002/prp2.438), 2018-11-08

Figure S1

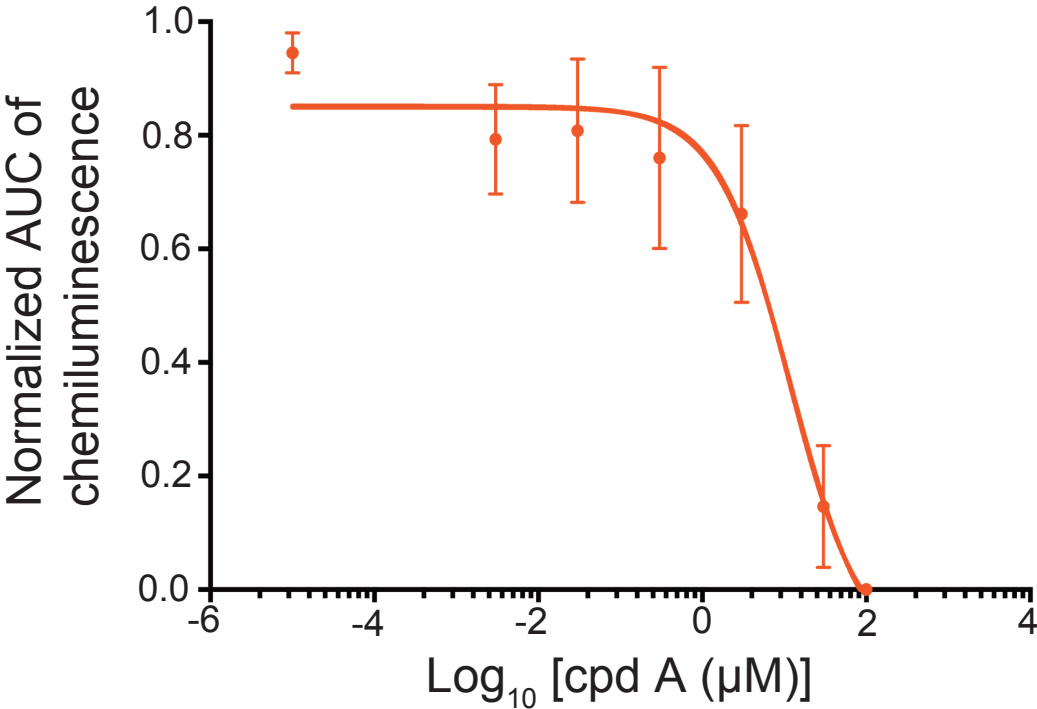

Supplement: PRP2-6-e00438-s001.pdf [file PRP2-6-e00438-s001.pdf]
